# Supplementary material for: Sulfonic acid-functionalized mesoporous carbon/silica as efficient catalyst for dehydration of fructose into 5-hydroxymethylfurfural
Source: Royal Society of Chemistry journal article supplement (doi:10.1039/c6ra20304c), 2016-01-01
Supplement: c6ra20304c1.pdf [file c6ra20304c1.pdf]

## Supporting Information

### **Sulfonic acid-functionalized mesoporous carbon/silica materials as efficient catalysts for dehydration of fructose into 5-hydroxymethylfurfural**

Xiaoning Tian,<sup>a</sup> Zhongqing Jiang,<sup>a,\*</sup> Yingying Jiang,<sup>a</sup> Weitong Xu,<sup>a</sup> Chenxu Li,<sup>b,a</sup>

Lijuan Luo<sup>a</sup> and Zhong-Jie Jiang,<sup>c,\*</sup>

<sup>a</sup> Department of Materials and Chemical Engineering, Ningbo University of Technology, Ningbo 315016, Zhejiang, China. Email: zhongqingjiang@hotmail.com

<sup>b</sup> Chemical Engineering Research Institute, Membrane Research Center, East China University of Science and Technology, Shanghai 200237, China.

<sup>c</sup> New Energy Research Institute, College of Environment and Energy, South China University of Technology, Guangzhou 510006, Guangdong, China. Email: zhongjiejiang1978@hotmail.com or eszjiang@scut.edu.cn

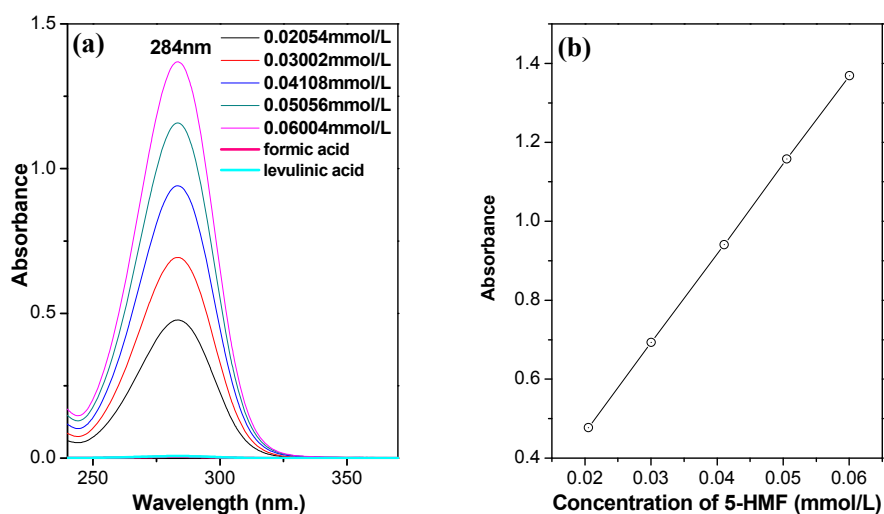

**Fig. S1.** (a) UV-Vis spectra of the 5-HMF solutions at the different concentrations and UV-Vis spectra of formic acid or levulinic acid. (b) Plot of absorbance at 284 nm vs. the 5-HMF concentration. The UV-visible absorption coefficient of the 5-HMF at 284 nm estimated is  $2.3 \times 10^4$  L/mol·cm.

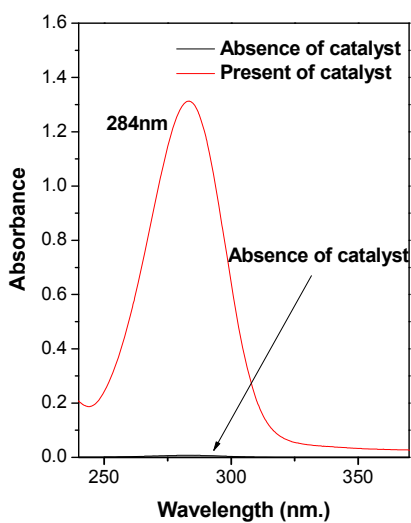

**Fig. S2** UV-Vis spectra of the solutions in the present and absence of the sulfonic acid-functionalized mesoporous carbon/silica (77%SC-S(3,0.32)).

**Table S1.** Pore structure and Specific surface area of the mesoporous silicas and the corresponding catalysts.

| samples          | Specific surface area(m <sup>2</sup> /g) | Pore size (nm) | Pore volume(cm <sup>3</sup> /g) |
|------------------|------------------------------------------|----------------|---------------------------------|
| S(2,0.32)        | 681                                      | 12.412         | 2.337                           |
| 22%SC-S(2,0.32)  | 528                                      | 5.622          | 0.6655                          |
| 77%SC-S(2,0.32)  | 444                                      | 3.823          | 0.2629                          |
| 200%SC-S(2,0.32) | 414                                      | 1.9            | 0.22                            |

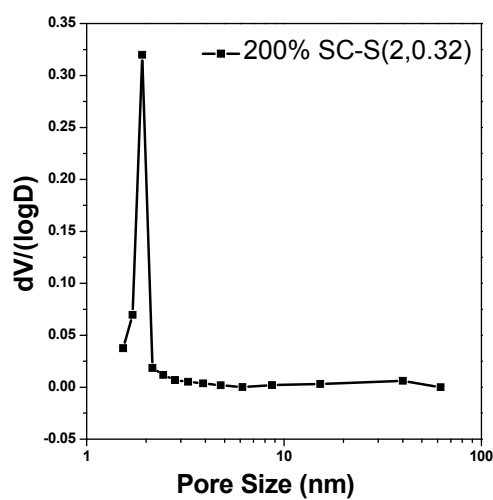

**Fig. S3** BJH pore size distribution of 200%SC-S(2,0.32).
